# Supplementary material
Source: Springer Nature journal article supplement (https://www.springermedizin.de/resource/supplementary/12875_2013_1073_MOESM2_ESM.pdf/9436052)
Supplement: MOESM2 [file 9436052]

**A**Are they in **target range** (4.0-7.0mmol/L)? If yes, leave dose unchanged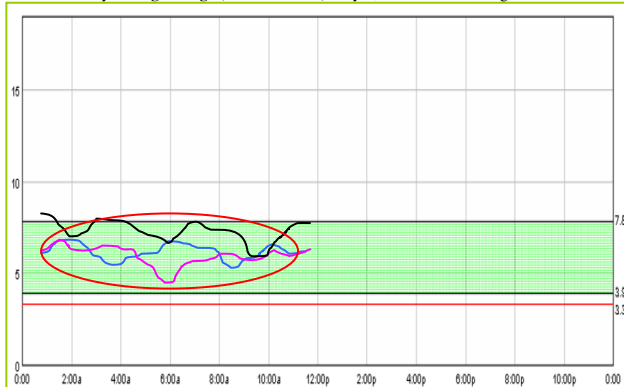

Are they **high** (>7.0mmol/L)? If yes, increase dose by 2 Units if averaging 7-8mmol/L;  
by 4 Units if averaging 8-10mmol/L; or by 6 Units if averaging >10mmol/L

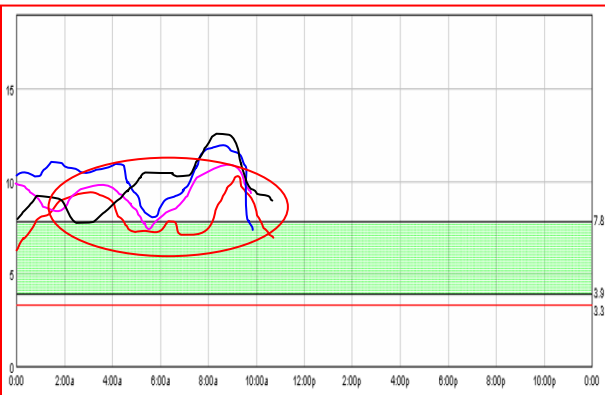

Are they **low** (<4.0mmol/L)? If yes, reduce dose by 2-4 Units

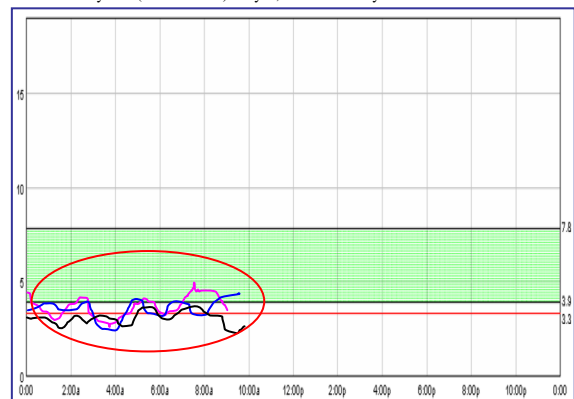

# Each colour line represents one day of retrospective glucose monitoring tracing. The green bar represents target glycemic area. Glucose measurement of interest is circled in red.  
X axis represents time (a=am; p=pm).  
Y axis represents blood glucose level in mmol/L.

**B**Are they all in **target range** (4.5-10mmol/L)? If yes, no action needed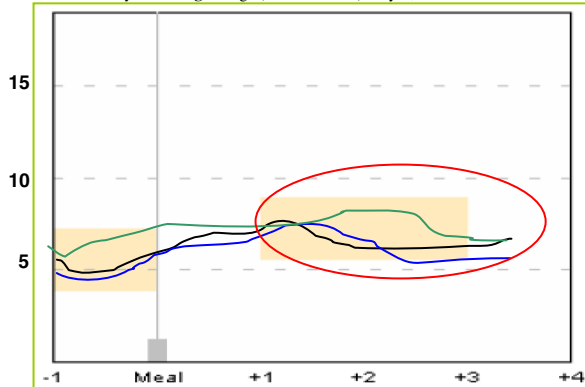

Are any **high** (>10mmol/L)? If yes, increase dose by 2 Units if averaging 10-12mmol/L;  
by 4 Units if averaging 12-14mmol/L; or by 6-8 Units if averaging >14mmol/L

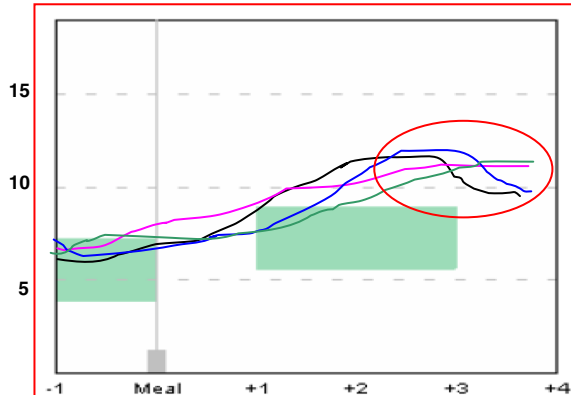

Are any **low** (<4.5mmol/L)? If yes, reduce dose by 2-4 units

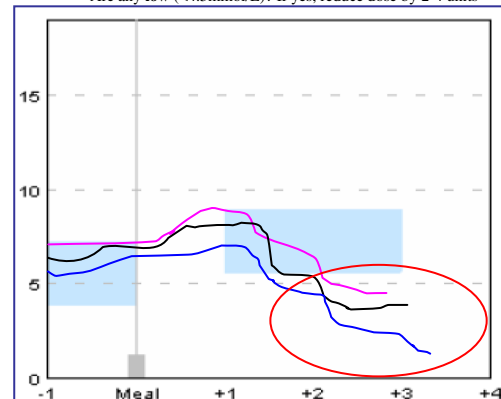

## Each colour line represents one day of retrospective glucose monitoring tracing. The orange, green and blue bars represents target glycemic area. Glucose measurement of interest is circled in red.  
X axis represents meal time in hours.  
Y axis represents blood glucose level in mmol/L.
